# Supplementary material for: From BaCl2 to Ba(NO3)Cl: significantly enhanced birefringence derived from π-conjugated [NO3]
Source: Royal Society of Chemistry journal article supplement (doi:10.1039/d1nj03282h), 2021-01-01
Supplement: d1nj03282h1.pdf [file d1nj03282h1.pdf]

***Supporting Information for***

**From BaCl<sub>2</sub> to Ba(NO<sub>3</sub>)Cl: Birefringence Enhanced Significantly  
Deriving from the  $\pi$ -conjugated [NO<sub>3</sub>]**

Zhen Chen,<sup>a,b</sup> Hao Zeng,<sup>a</sup> Shujuan Han,<sup>a,b\*</sup> Zhihua Yang,<sup>a,b</sup> and Shilie Pan<sup>a,b\*</sup>

<sup>a</sup>CAS Key Laboratory of Functional Materials and Devices for Special Environments,  
Xinjiang Technical Institute of Physics & Chemistry, CAS; Xinjiang Key Laboratory of  
Electronic Information Materials and Devices, 40-1 South Beijing Road, Urumqi  
830011, China.

<sup>b</sup>Center of Materials Science and Optoelectronics Engineering, University of Chinese  
Academy of Sciences, Beijing 100049, China.

\*Corresponding author, E-mail: [slpan@ms.xjb.ac.cn](mailto:slpan@ms.xjb.ac.cn)

**Table S1.** Crystal data and structure refinement for Ba(NO<sub>3</sub>)Cl.

|                                                                                                                      |                                                                 |
|----------------------------------------------------------------------------------------------------------------------|-----------------------------------------------------------------|
| Empirical formula                                                                                                    | Ba(NO <sub>3</sub> )Cl                                          |
| Temperature                                                                                                          | 273.15 K                                                        |
| Crystal system, space group                                                                                          | Orthorhombic, <i>Pnma</i>                                       |
| Unit cell dimensions (Å)                                                                                             | $a = 8.956(17)$<br>$b = 5.297(11)$<br>$c = 8.449(13)$           |
| Volume (Å <sup>3</sup> )                                                                                             | 400.8(13)                                                       |
| Z, Calculated density (g/cm <sup>3</sup> )                                                                           | 4, 3.891                                                        |
| Absorption coefficient (mm <sup>-1</sup> )                                                                           | 10.423                                                          |
| <i>F</i> (000)                                                                                                       | 416                                                             |
| Theta range for data collection (°)                                                                                  | 3.315 - 25.242                                                  |
| Limiting indices                                                                                                     | $-11 \leq h \leq 11, -6 \leq k \leq 6, -9 \leq l \leq 10$       |
| Reflections collected / unique                                                                                       | 2912 / 503 [ <i>R</i> (int) = 0.100]                            |
| Completeness to theta                                                                                                | 99.80%                                                          |
| Goodness-of-fit on <i>F</i> <sup>2</sup>                                                                             | 1.100                                                           |
| Final <i>R</i> indices [ <i>F</i> <sub>o</sub> <sup>2</sup> > 2σ( <i>F</i> <sub>c</sub> <sup>2</sup> )] <sup>a</sup> | <i>R</i> <sub>1</sub> = 0.0392, <i>wR</i> <sub>2</sub> = 0.0724 |
| <i>R</i> indices (all data) <sup>a</sup>                                                                             | <i>R</i> <sub>1</sub> = 0.0692, <i>wR</i> <sub>2</sub> = 0.0845 |
| Largest diff. peak and hole (e·Å <sup>-3</sup> )                                                                     | 1.921 and -1.960                                                |

<sup>a</sup> $R_1 = \sum ||F_o| - |F_c| | / \sum |F_o|$  and  $wR_2 = [\sum w(F_o^2 - F_c^2)^2 / \sum wF_o^4]^{1/2}$  for  $F_o^2 > 2\sigma(F_o^2)$ .

**Table S2.** Atomic coordinates ( $\times 10^4$ ) and equivalent isotropic displacement parameters ( $\text{\AA}^2 \times 10^3$ ) for Ba(NO<sub>3</sub>)Cl.  $U(\text{eq})$  is defined as one third of the trace of the orthogonalized  $U_{ij}$  tensor.

|       | X        | Y        | Z        | U(eq) |
|-------|----------|----------|----------|-------|
| Ba(1) | 7348(1)  | 7500     | 3882(1)  | 24(1) |
| N(1)  | 5000(10) | 2500     | 1734(10) | 25(2) |
| O(1)  | 5681(6)  | 4531(12) | 1507(5)  | 34(1) |
| O(2)  | 3672(8)  | 2500     | 2130(8)  | 31(2) |
| Cl(1) | 6182(3)  | 2500     | 5470(3)  | 26(1) |

**Table S3.** Selected bond lengths (Å) and angles (°) for Ba(NO<sub>3</sub>)Cl.

|                      |            |                       |            |
|----------------------|------------|-----------------------|------------|
| Ba(1)-O(1)           | 2.954(6)   | Ba(1)-Cl(1)#7         | 3.169(5)   |
| Ba(1)-O(1)#1         | 3.032(6)   | Ba(1)-Cl(1)           | 3.148(5)   |
| Ba(1)-O(1)#2         | 2.954(6)   | Ba(1)-Cl(1)#8         | 3.148(5)   |
| Ba(1)-O(1)#3         | 3.032(6)   | N(1)-O(1)             | 1.251(7)   |
| Ba(1)-O(2)#4         | 3.025(6)   | N(1)-O(1)#9           | 1.251(7)   |
| Ba(1)-O(2)#5         | 3.025(6)   | N(1)-O(2)             | 1.236(11)  |
| Ba(1)-Cl(1)#6        | 3.209(7)   |                       |            |
| O(1)-Ba(1)-O(1)#2    | 64.3(3)    | O(1)#3-Ba(1)-Cl(1)#8  | 65.34(14)  |
| O(1)#2-Ba(1)-O(1)#1  | 168.5(2)   | O(1)#2-Ba(1)-Cl(1)#7  | 65.95(14)  |
| O(1)-Ba(1)-O(1)#1    | 127.02(12) | O(2)#5-Ba(1)-O(1)#1   | 106.8(2)   |
| O(1)-Ba(1)-O(1)#3    | 168.5(2)   | O(2)#4-Ba(1)-O(1)#3   | 106.8(2)   |
| O(1)#2-Ba(1)-O(1)#3  | 127.02(12) | O(2)#5-Ba(1)-O(1)#3   | 70.61(19)  |
| O(1)#3-Ba(1)-O(1)#1  | 41.6(2)    | O(2)#4-Ba(1)-O(1)#1   | 70.61(19)  |
| O(1)#2-Ba(1)-O(2)#5  | 62.6(2)    | O(2)#5-Ba(1)-O(2)#4   | 122.2(3)   |
| O(1)#2-Ba(1)-O(2)#4  | 118.2(2)   | O(2)#4-Ba(1)-Cl(1)#8  | 170.85(14) |
| O(1)-Ba(1)-O(2)#4    | 62.6(2)    | O(2)#5-Ba(1)-Cl(1)    | 170.85(14) |
| O(1)-Ba(1)-O(2)#5    | 118.2(2)   | O(2)#5-Ba(1)-Cl(1)#8  | 60.90(17)  |
| O(1)#1-Ba(1)-Cl(1)#7 | 115.07(16) | O(2)#5-Ba(1)-Cl(1)#7  | 65.18(13)  |
| O(1)-Ba(1)-Cl(1)     | 70.95(15)  | O(2)#4-Ba(1)-Cl(1)    | 60.90(17)  |
| O(1)#1-Ba(1)-Cl(1)#8 | 100.36(15) | O(2)#4-Ba(1)-Cl(1)#7  | 65.18(13)  |
| O(1)#3-Ba(1)-Cl(1)   | 100.36(15) | O(2)#5-Ba(1)-Cl(1)#6  | 115.74(14) |
| O(1)-Ba(1)-Cl(1)#7   | 65.95(14)  | O(2)#4-Ba(1)-Cl(1)#6  | 115.74(14) |
| O(1)#2-Ba(1)-Cl(1)   | 124.73(16) | O(1)#9-N(1)-O(1)      | 118.60(9)  |
| O(1)#1-Ba(1)-Cl(1)   | 65.34(14)  | O(2)-N(1)-O(1)        | 120.70(5)  |
| O(1)#2-Ba(1)-Cl(1)#6 | 67.53(13)  | O(2)-N(1)-O(1)#9      | 120.70(5)  |
| O(1)#3-Ba(1)-Cl(1)#7 | 115.07(16) | Cl(1)#8-Ba(1)-Cl(1)   | 114.58(14) |
| O(1)#1-Ba(1)-Cl(1)#6 | 116.65(13) | Cl(1)#7-Ba(1)-Cl(1)#6 | 124.38(7)  |
| O(1)-Ba(1)-Cl(1)#6   | 67.53(13)  | Cl(1)-Ba(1)-Cl(1)#6   | 66.43(7)   |
| O(1)-Ba(1)-Cl(1)#8   | 124.73(16) | Cl(1)#8-Ba(1)-Cl(1)#7 | 121.72(7)  |
| O(1)#3-Ba(1)-Cl(1)#6 | 116.65(13) | Cl(1)-Ba(1)-Cl(1)#7   | 121.72(7)  |
| O(1)#2-Ba(1)-Cl(1)#8 | 70.95(15)  | Cl(1)#8-Ba(1)-Cl(1)#6 | 66.43(7)   |

Symmetry transformations used to generate equivalent atoms:

#1  $-x+3/2, -y+1, z+1/2$ #2  $x, -y+3/2, z$

#3  $-x+3/2, y+1/2, z+1/2$

#4  $x+1/2, y, -z+1/2$

#5  $x+1/2, y+1, -z+1/2$

#6  $-x+1, -y+1, -z+1$

#7  $-x+3/2, -y+1, z-1/2$

#8  $x, y+1, z$

#9  $x, -y+1/2, z$

#10  $x-1/2, y-1, -z+1/2$

#11  $x-1/2, y, -z+1/2$

#12  $x, y-1, z$

**Table S4.** Bonding electron density difference ( $\Delta\rho$ ) and contribution percent  $w$  (%) of different units in Ba(NO<sub>3</sub>)Cl calculated by the REDA method.

| Units                               | $\Delta\rho$ ( x 10 <sup>4</sup> ) | $w$ (%) |
|-------------------------------------|------------------------------------|---------|
| [NO <sub>3</sub> ]                  | 278                                | 93.7    |
| [BaO <sub>6</sub> Cl <sub>4</sub> ] | 18.6                               | 6.3     |

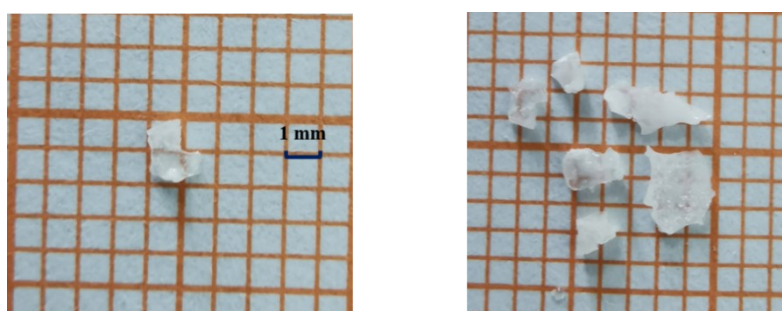

**Figure S1.** The photograph of the Ba(NO<sub>3</sub>)Cl crystal plate.

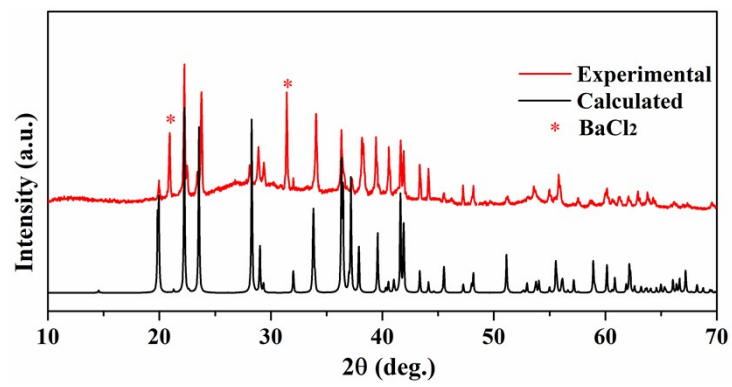

**Figure S2.** Powder XRD patterns of Ba(NO<sub>3</sub>)Cl.



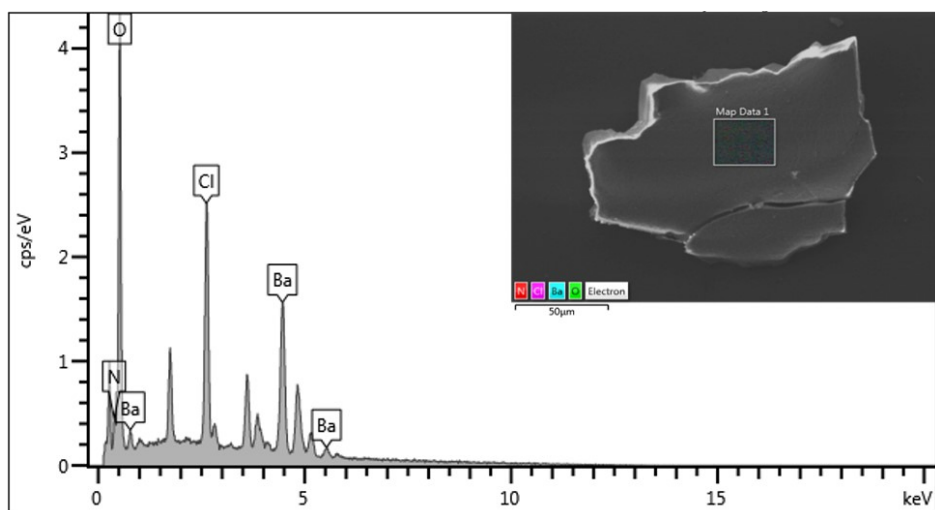

**Figure S3.** The EDX spectrum of Ba(NO<sub>3</sub>)Cl.

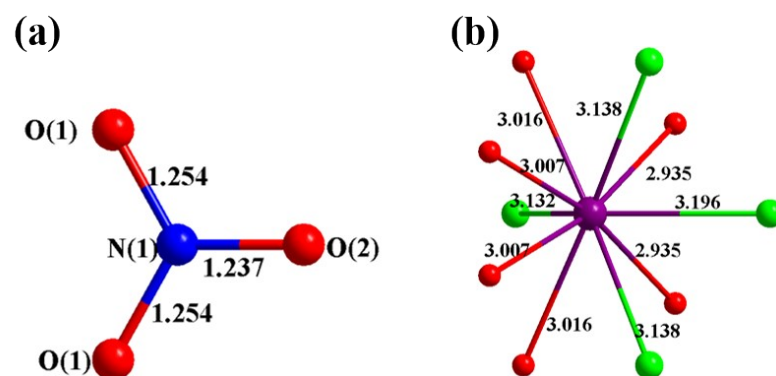

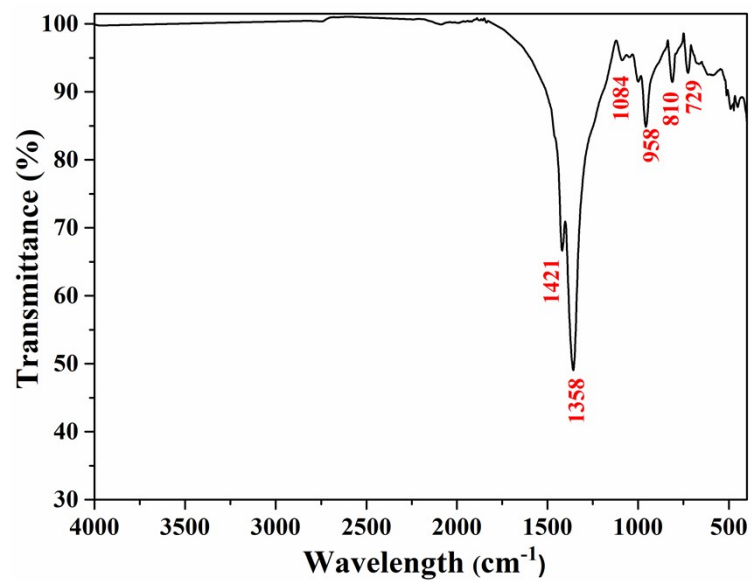

**Figure S5.** The IR spectrum of Ba(NO<sub>3</sub>)Cl.
